# Supplementary material
Source: publisher site journal article supplement (https://www.spandidos-publications.com/8680/downloadSupplementary)
Supplement: Supplementary file 1 [file downloadSupplementary]

Table SI. Primer sequences used for RT-qPCR.

| Gene              | Forward primer (5'-3')  | Reverse primer (5'-3')  |
|-------------------|-------------------------|-------------------------|
| <i>Sod1</i>       | GGTGAACCAGTTGTGTTGTCAGG | ATGAGGTCCTGCACTGGTACAG  |
| <i>Gstp1</i>      | TGGAAGGAGGAGGTGGTTACCA  | GGTAAAGGGTGAGGTCTCCATC  |
| <i>Nlrp3</i>      | TCACAACCTCGCCCAAGGAGGAA | AAGAGACCACGGCAGAAGCTAG  |
| <i>Il1b</i>       | TGGACCTTCCAGGATGAGGACA  | GTTTCATCTCGGAGCCTGTAGTG |
| <i>Pycard/Asc</i> | CTGCTCAGAGTACAGCCAGAAC  | CTGTCCTTCAGTCAGCACACTG  |
| <i>Wt1</i>        | GGTTTTCTCGCTCAGACCAGCT  | ATGAGTCCTGGTGTGGGTCTTC  |
| <i>Cdkn1a</i>     | TCGCTGTCTTGCACTCTGGTGT  | CCAATCTGCGCTTGGAGTGATAG |
| <i>Gapdh</i>      | CATCACTGCCACCCAGAAGACTG | ATGCCAGTGAGCTTCCCGTTCAG |
